# Supplementary material for: Co-occurring internalizing and externalizing psychopathology in childhood and adolescence: a network approach
Source: Springer Nature journal article supplement (doi:10.1007/s00787-018-1128-x), 2018-03-08
Supplement: MOESM1 [file 15519984]

**Internalizing and externalizing disorders in childhood and adolescence: A network  
approach**

Eoin McElroy<sup>1,2</sup>, Mark Shevlin<sup>1</sup>, Jamie Murphy<sup>1</sup>, Orla McBride<sup>1</sup>

<sup>1</sup> School of Psychology, Ulster University, Northern Ireland

<sup>2</sup> Department of Psychological Sciences, University of Liverpool, United Kingdom

**Supplementary materials**

### **DAWBA recoding**

Official diagnoses were only available at the 7.5 year time point. In order to make use of data from subsequent time points, a comprehensive recoding strategy was employed. The DAWBA contains skip patterns; first respondents are asked about the presence and severity of symptoms, e.g. “In the last 4 weeks, have there been times when [Name] has been very sad, miserable, unhappy or tearful?”, “Over the last 4 weeks, has there been a period when s/he has been really miserable nearly every day?”. If the respondent does not endorse the requisite symptoms/severity, they are deemed to have screened negative for that particular disorder. If the requisite pattern of symptoms/severity is endorsed, respondents are next asked to rate on a 4-point Likert scale the levels of distress associated with the symptoms (e.g. “How much has his/her sadness, irritability or loss of interest upset or distressed him/her?”), and overall impaired functionality (e.g. “Has his/her sadness, irritability or loss of interest interfered with...”). As per the ALSPAC codebook, the various impaired functionality questions can be summed to form a total burden score. In order to create quasi-diagnostic variables that closely mirror DSM-IV diagnoses, children were coded with a 1 if they endorsed the requisite symptoms and severity, along with significant distress (score of 3 or 4 on distress question) or impaired functionality/burden (a score of +2 standard deviations above the mean on total burden variable). In the case of ODD, teacher complaint was used in place of distress. For CD, a binary variable reflecting ‘any frequent/definite troublesome behaviour’ was computed, as per ALSPAC codebook guidelines. This recoding process resulted in 8 binary quasi-diagnostic variables at each of the three time points.

Table S1. Bivariate Correlations

|         | SPP_7  | SOP_7  | PTSD_7 | GAD_7  | DEP_7  | ADHD_7 |
|---------|--------|--------|--------|--------|--------|--------|
| SPP_7   | 1      |        |        |        |        |        |
| SOP_7   | .172** | 1      |        |        |        |        |
| PTSD_7  | .135** | .098** | 1      |        |        |        |
| GAD_7   | .222** | .264** | .199** | 1      |        |        |
| DEP_7   | .161** | .177** | .175** | .402** | 1      |        |
| ADHD_7  | .092** | .144** | .101** | .240** | .223** | 1      |
| ODD_7   | .098** | .160** | .128** | .219** | .228** | .576** |
| CD_7    | .045** | .075** | .125** | .116** | .099** | .216** |
| SPP_10  | .173** | .061** | .054** | .109** | .047** | .037*  |
| SOP_10  | .112** | .285** | .057** | .166** | .111** | .157** |
| PTSD_10 | 0.023  | 0.027  | .136** | .062** | .076** | .081** |
| GAD_10  | .168** | .143** | .087** | .249** | .175** | .185** |
| DEP_10  | .090** | .070** | .099** | .140** | .202** | .131** |
| ADHD_10 | .083** | .120** | .116** | .132** | .161** | .448** |
| ODD_10  | .100** | .101** | .125** | .135** | .109** | .332** |
| CD_10   | .044** | .038*  | .080** | .050** | .090** | .145** |
| SPP_14  | .113** | .050** | .048** | .122** | .074** | .067** |
| SOP_14  | .118** | .221** | .056** | .130** | .088** | .116** |
| PTSD_14 | .048** | 0.029  | .179** | .050** | .069** | .083** |
| GAD_14  | .115** | .129** | .118** | .189** | .140** | .167** |
| DEP_14  | .097** | .055** | .058** | .117** | .131** | .109** |
| ADHD_14 | .068** | .088** | .094** | .127** | .097** | .347** |
| ODD_14  | .044** | .063** | .063** | .098** | .085** | .264** |
| CD_14   | 0.000  | 0.025  | 0.023  | .035*  | 0.027  | .133** |

\*\* . Correlation is significant at the 0.01 level (2-tailed).

\* . Correlation is significant at the 0.05 level (2-tailed).

| ODD_7  | CD_7   | SPP_10 | SOP_10 | PTSD_10 | GAD_10 | DEP_10 |
|--------|--------|--------|--------|---------|--------|--------|
| 1      |        |        |        |         |        |        |
| .260** | 1      |        |        |         |        |        |
| .046** | 0.009  | 1      |        |         |        |        |
| .155** | .078** | .093** | 1      |         |        |        |
| .075** | .047** | .076** | .056** | 1       |        |        |
| .161** | .079** | .175** | .205** | .120**  | 1      |        |
| .135** | .064** | .103** | .123** | .155**  | .318** | 1      |
| .322** | .150** | .063** | .188** | .093**  | .200** | .167** |
| .379** | .157** | .091** | .122** | .095**  | .226** | .200** |
| .194** | .210** | .047** | .103** | .075**  | .126** | .151** |
| .050** | 0.023  | .235** | .077** | 0.015   | .141** | .063** |
| .124** | .053** | .095** | .280** | .058**  | .155** | .093** |
| .056** | .046** | 0.025  | 0.019  | .213**  | .084** | .107** |
| .128** | .079** | .114** | .150** | .092**  | .306** | .200** |
| .078** | .079** | .068** | .090** | .092**  | .177** | .205** |
| .291** | .169** | .042** | .111** | .096**  | .143** | .150** |
| .320** | .190** | .033*  | .077** | .116**  | .128** | .133** |
| .143** | .177** | -0.003 | .058** | .088**  | .086** | .100** |

| ADHD_10 | ODD_10 | CD_10  | SPP_14 | SOP_14 | PTSD_14 | GAD_14 |
|---------|--------|--------|--------|--------|---------|--------|
| 1       |        |        |        |        |         |        |
| .387**  | 1      |        |        |        |         |        |
| .216**  | .280** | 1      |        |        |         |        |
| .041**  | .051** | .035*  | 1      |        |         |        |
| .128**  | .098** | .056** | .147** | 1      |         |        |
| .073**  | .073** | .069** | .046** | .110** | 1       |        |
| .122**  | .125** | .122** | .191** | .258** | .200**  | 1      |
| .103**  | .106** | .084** | .098** | .145** | .202**  | .361** |
| .411**  | .253** | .169** | .061** | .122** | .117**  | .175** |
| .223**  | .314** | .202** | .030*  | .105** | .147**  | .172** |
| .127**  | .141** | .201** | 0.013  | .053** | .137**  | .130** |

---

| DEP_14 | ADHD_14 | ODD_14 | CD_14 |
|--------|---------|--------|-------|
|--------|---------|--------|-------|

---

|        |        |        |   |  |
|--------|--------|--------|---|--|
| 1      |        |        |   |  |
| .203** | 1      |        |   |  |
| .223** | .464** | 1      |   |  |
| .165** | .231** | .335** | 1 |  |

---

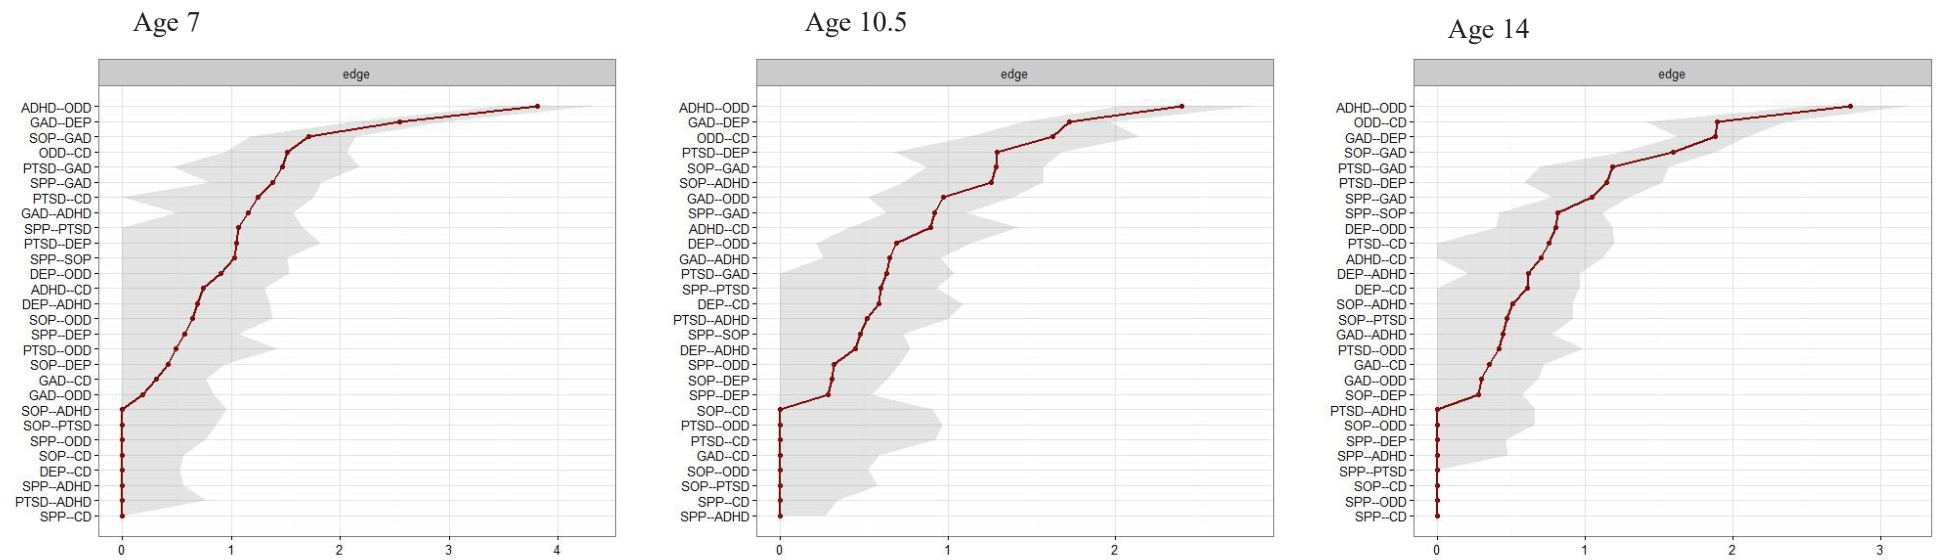

Fig S1. Bootstrapped edge weights

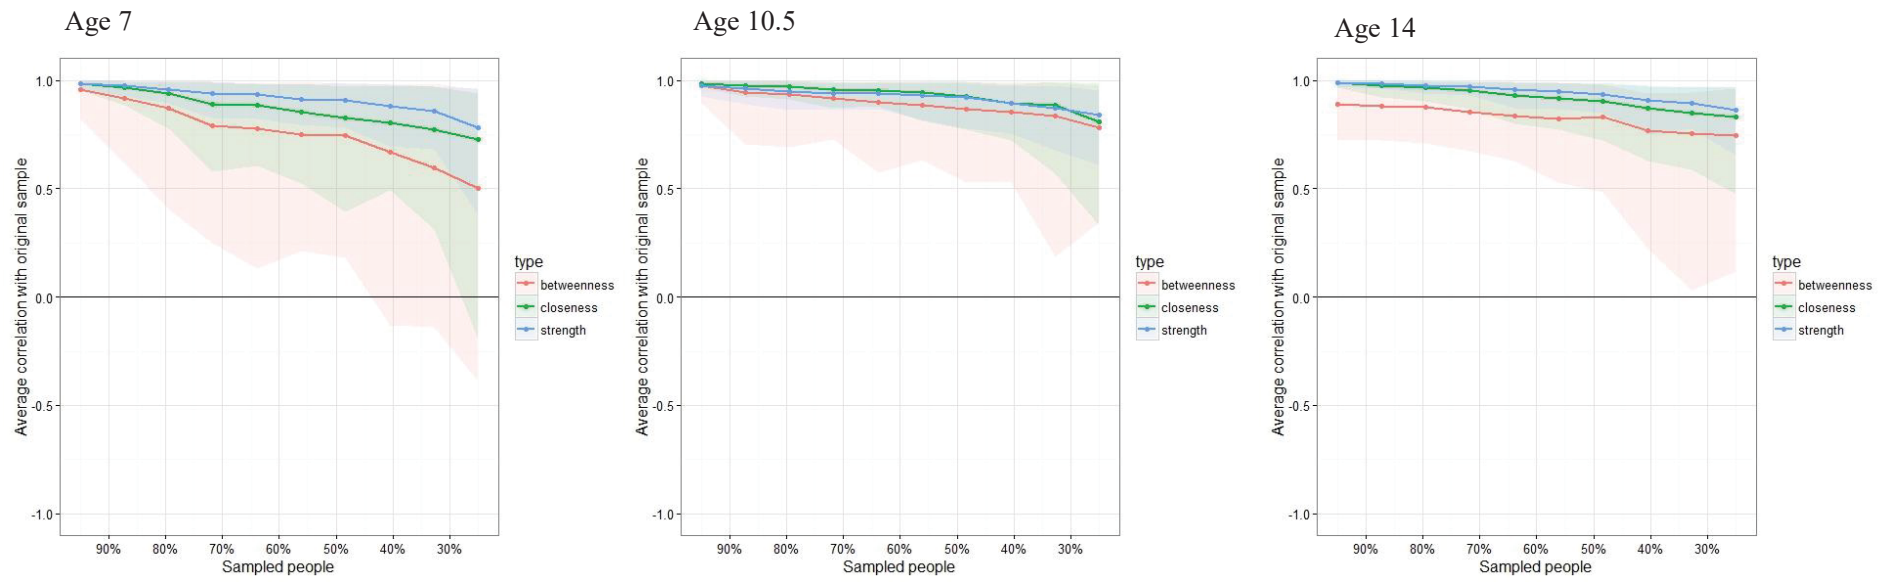

Fig S2. Average correlations between centrality indices in original sample and subsets



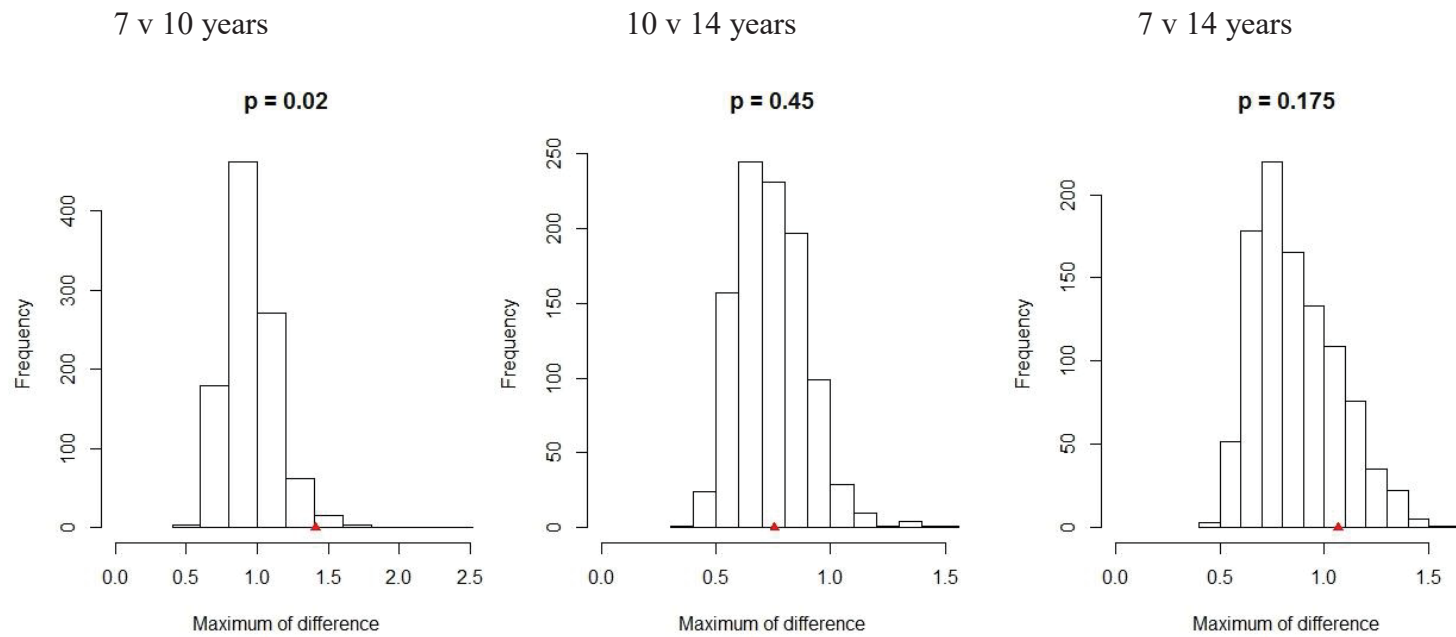

Fig S3. Results from non-parametric permutation test. Following Bonferroni adjustment,  $\alpha$  value for statistical significance set at 0.016.
